# Supplementary material
Source: publisher figshare collection journal article supplement (https://tandf.figshare.com/ndownloader/files/5458382)
Supplement: Supplementary file 1 [file 5458382]

Electron Ionization Mass Spectra of Organophosphorus Compounds Part V: Mass Fragmentation Modes of Some Azolyl, Azinyl and Azepinyl Phosphonates as Cyclic α-Aminophosphonates

**Tarik E. Ali and Somaia M. Abdel-Kariem***

*Department of Chemistry, Faculty of Education, Ain Shams University, Roxy, Cairo, Egypt,*

Email: somaia_mohamed85@yahoo.com

**Supplemental Materials**

**
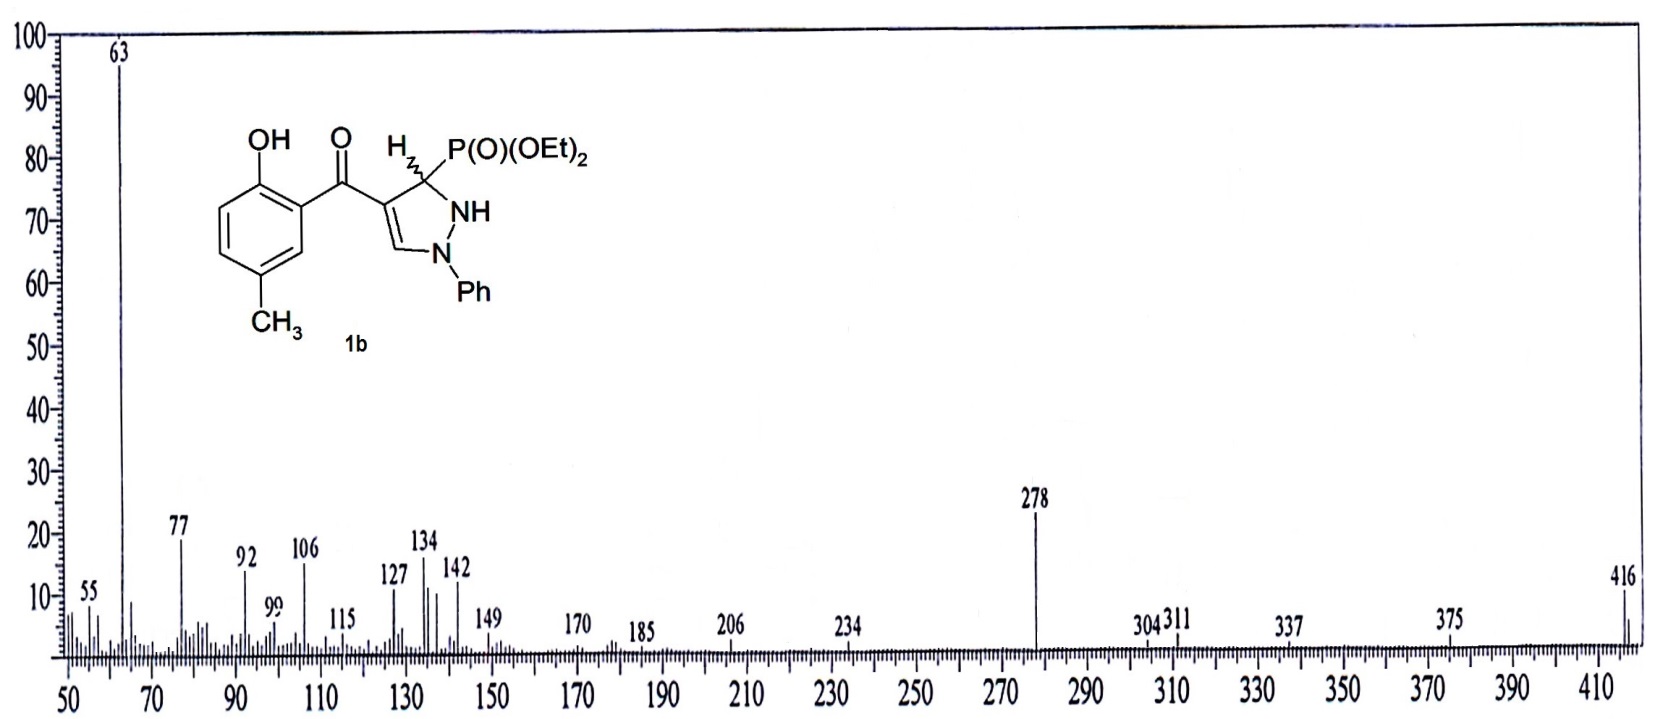
**

**Figure S 1:** Mass spectrum of compound **1b**

**
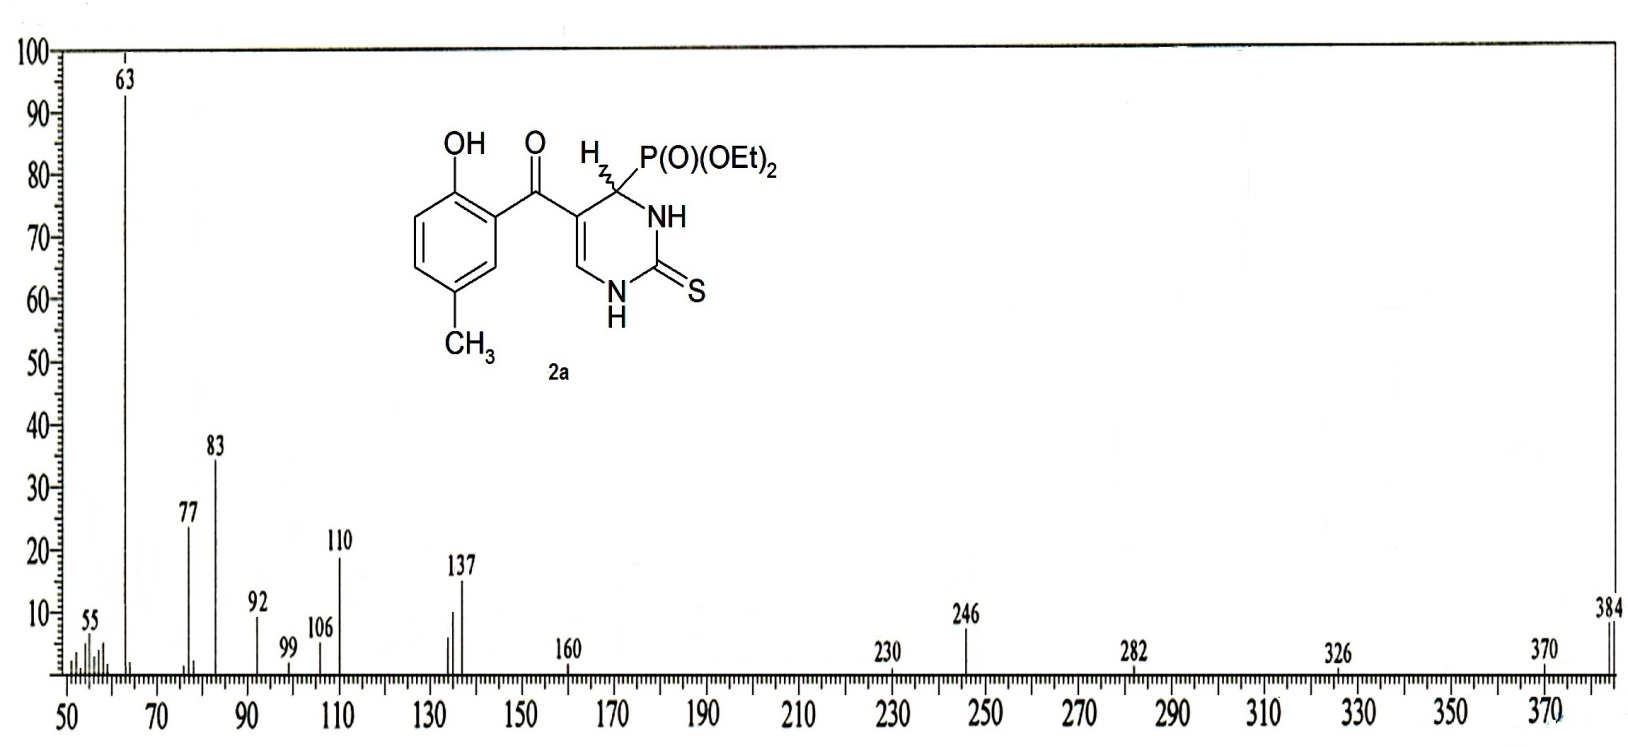
**

**Figure S 2:** Mass spectrum of compound **2a**

**
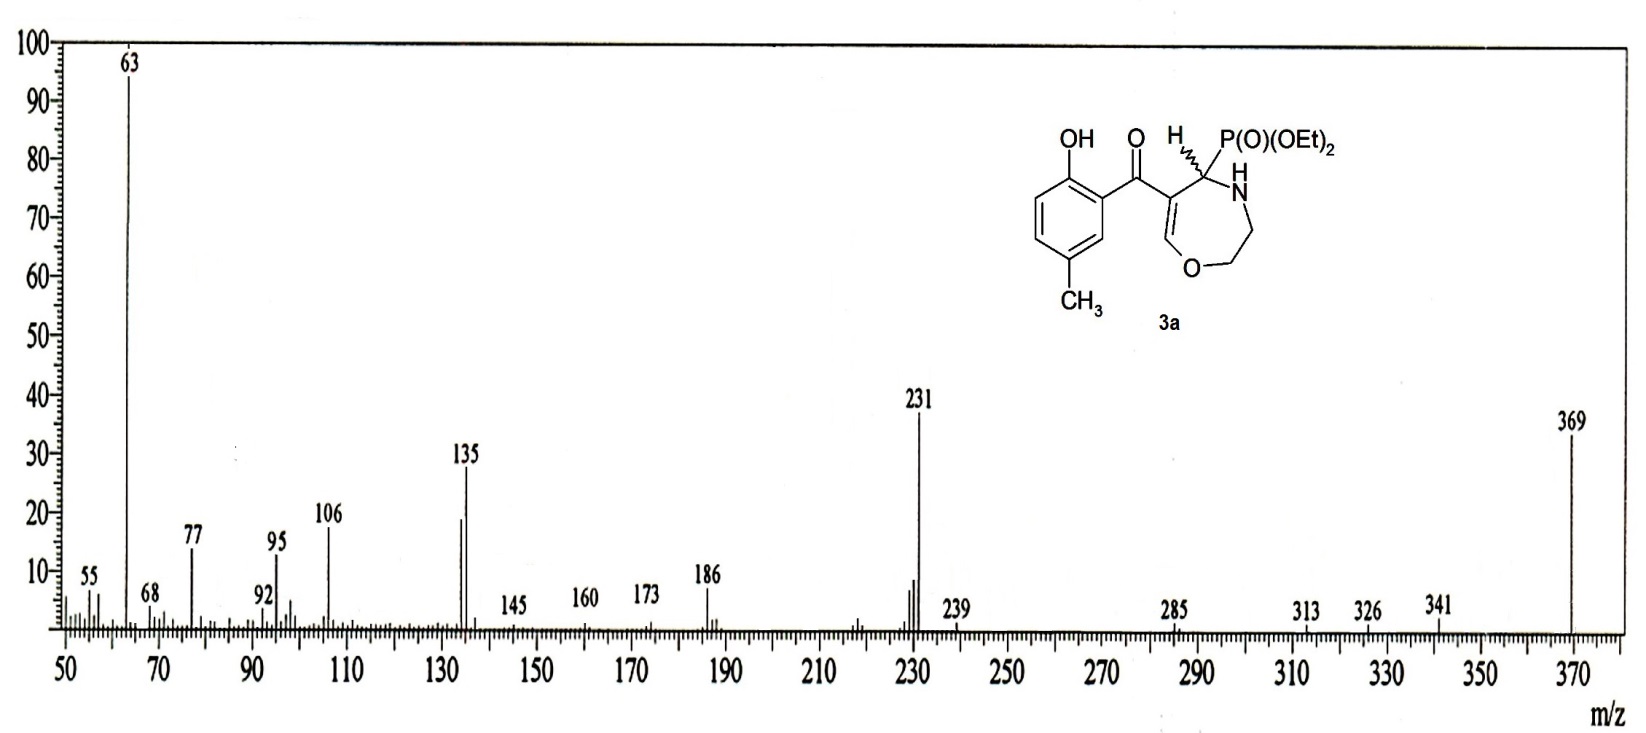
Figure S 3:** Mass spectrum of compound **3a**

**
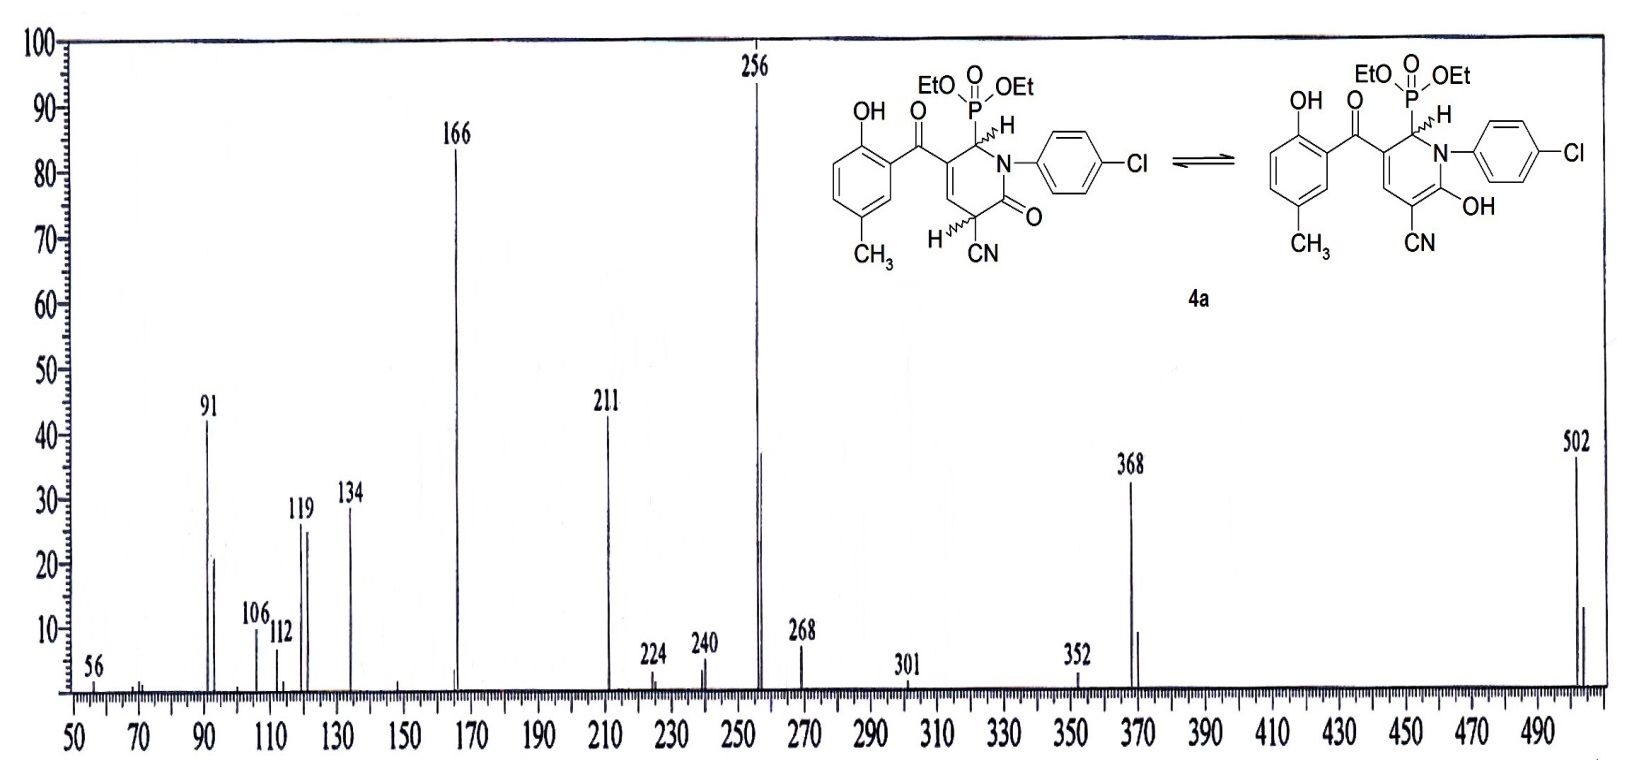
**

**Figure S 4:** Mass spectrum of compound **4a**
